# Supplementary material for: Microglia activation in postmortem brains with schizophrenia demonstrates distinct morphological changes between brain regions
Source: PubMed Central journal article supplement (PMC8713533; doi:10.1111/bpa.13003), 2021-07-23
Supplement: BPA-32-e13003-s002.pdf [file BPA-32-e13003-s002.pdf]

## Supplementary Data 2

Measure Constraints Table 1

| Analysis                  | Microglia Size ( $\mu\text{m}^2$ ) Constraints | Thresholding Constraints (Intensity) | Additional Background Adjustments | Analysis Platform           |
|---------------------------|------------------------------------------------|--------------------------------------|-----------------------------------|-----------------------------|
| Microglial Cell Density   | 10- 500                                        | (15 - 165)                           | 8 Pixel Connectivity              | ImagePro(Media Cybernetics) |
| Nearest Neighbor Analysis | 15-500                                         | Binary                               | None                              | Image J (NIH)               |
| Cell Size, "Parent"       | 10- 300                                        | (15 - 165)                           | 8 Pixel Connectivity              | ImagePro(Media Cybernetics) |
| Cell Soma, "Child"        | 20- 125                                        | (25 - 125)                           | 100%-filled holes                 | ImagePro(Media Cybernetics) |
| Sholl Analysis            | 7-125                                          | Binary                               | Manual deletion of noise          | Image J (NIH)               |

Supplementary Table 1. A review of the measure constraints used in the applications to estimate cell density and morphological changes.

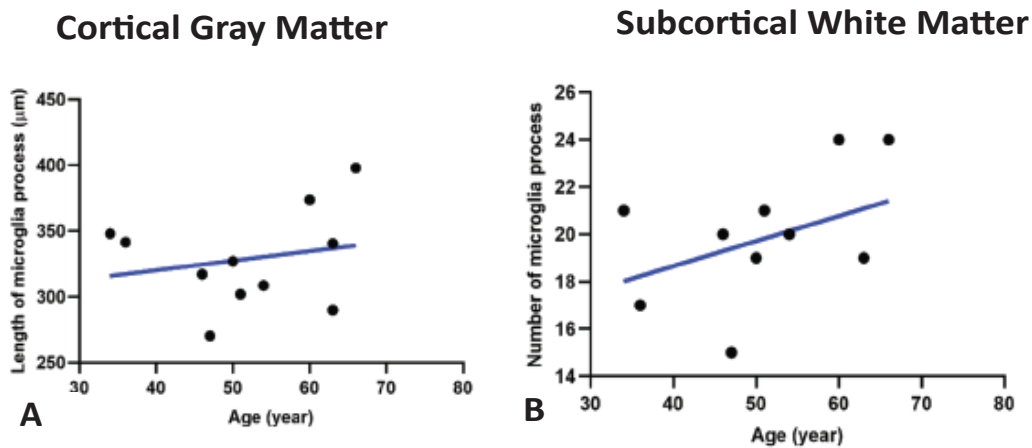

Supplementary Figure 2. The correlation between the ramification of microglia and age was not identified in control cases in either the cortical gray matter(A) or the subcortical white matter (B) of BA 9

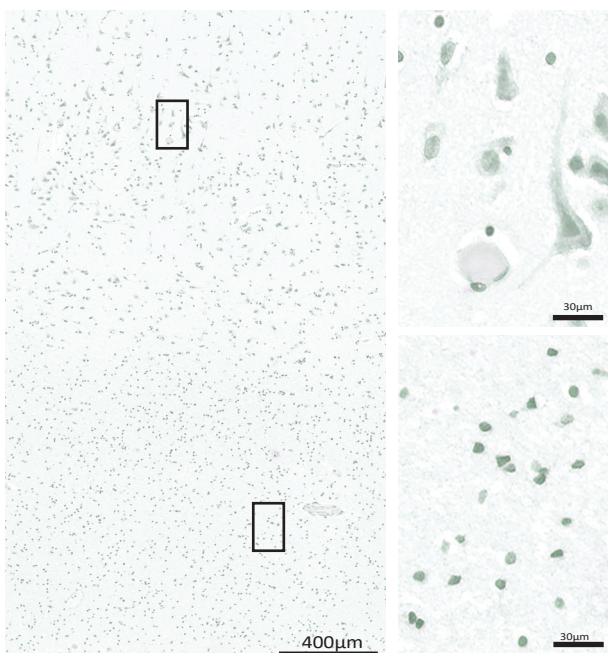

Supplementary Figure 3. A photomicrograph of a negative control from the BA 22 region (A) with higher magnification examples seen from the cortical gray matter (B) and the subcortical white matter region (C).
